# Supplementary material for: Association Between Preoperative Lipid Profiles and New-onset Diabetes After Transplantation in Chinese Kidney Transplant Recipients: a Retrospective Cohort Study
Source: Research Square preprint supplement (doi:10.21203/rs.3.rs-93898/v1), 2020-10-21
Supplement: Supplementary file 1 [file 0b78886a170aa177b5044202.docx]

**Additional file 4 Subgroup analysis of NODAT risk associated with non-HDL-C according to covariates by COX regression.**

| Subgroup | Number | HR (95%CI) | P-value for interaction |
| --- | --- | --- | --- |
| Sex |  |  | 0.2544 |
| Male | 316 | 1.57 (1.15, 2.15) |  |
| Female | 133 | 1.07 (0.59, 1.93) |  |
| BMI (kg/m2) |  |  | 0.1305 |
| <24 | 381 | 1.44 (1.11, 1.88) |  |
| >=24 | 68 | 2.96 (0.73, 12.04) |  |
| Family history of diabetes |  |  | 0.9599 |
| No | 422 | 1.40 (1.07, 1.83) |  |
| Yes | 27 | 1.25 (0.44, 3.56) |  |
| Polycystic kidney |  |  | 0.2847 |
| No | 359 | 1.54 (1.16, 2.03) |  |
| Yes | 20 | 1.34 (0.34, 5.35) |  |
| Use of IL-2Ra |  |  | 0.7243 |
| No | 162 | 1.52 (0.98, 2.33) |  |
| Yes | 287 | 1.40 (0.97, 2.03) |  |
| CMV infection |  |  | 0.4862 |
| No | 418 | 1.47 (1.13, 1.92) |  |
| Yes | 31 | 1.80 (0.17, 3.88) |  |
| Preoperative hypertension |  |  | 0.4402 |
| No | 70 | 1.35 (0.66, 2.76) |  |
| Yes | 379 | 1.48 (1.11, 1.98) |  |
| Maintenance drug |  |  | 0.6886 |
| CsA | 250 | 1.43 (0.97, 2.10) |  |
| FK506 | 199 | 1.83 (1.17, 2.86) 0 |  |
| Donor |  |  | 0.7430 |
| Dead body | 217 | 1.20 (0.86, 1.67) |  |
| Relatives | 171 | 1.87 (1.20, 2.92) |  |
| Acute rejection |  |  | 0.6039 |
| No | 300 | 1.25 (0.86, 1.81) |  |
| Yes | 54 | 1.53 (0.12, 2.25) |  |

Note : adjust for the other variables except for those analyzed by subgroup: Sex; Age; BMI; Family history of diabetes; Polycystic kidney; CMV infection; Preoperative FPG; Triglyceride; Use of IL-2Ra; Maintenance drug.
